# Supplementary material for: Different Vancomycin-Intermediate Staphylococcus aureus Phenotypes Selected from the Same ST100-hVISA Parental Strain
Source: PubMed Central journal article supplement — Microb Drug Resist. 2017 Jan 1;23(1):44–50. doi: 10.1089/mdr.2016.0160 (PMC5206683; doi:10.1089/mdr.2016.0160), 2017-01-01

# Supplementary Data 1

## High Performance Liquid Chromatography

RP-HPLC mucopeptide elution patterns of mutanolysin-digested peptidoglycan. (A) D1; (B) D2; (C) D23C9 mutant;

and (D) D2P11 mutant. Arrows indicate peaks showing differences in area under curve within the different chromatograms (retention time 47 and 64 min).

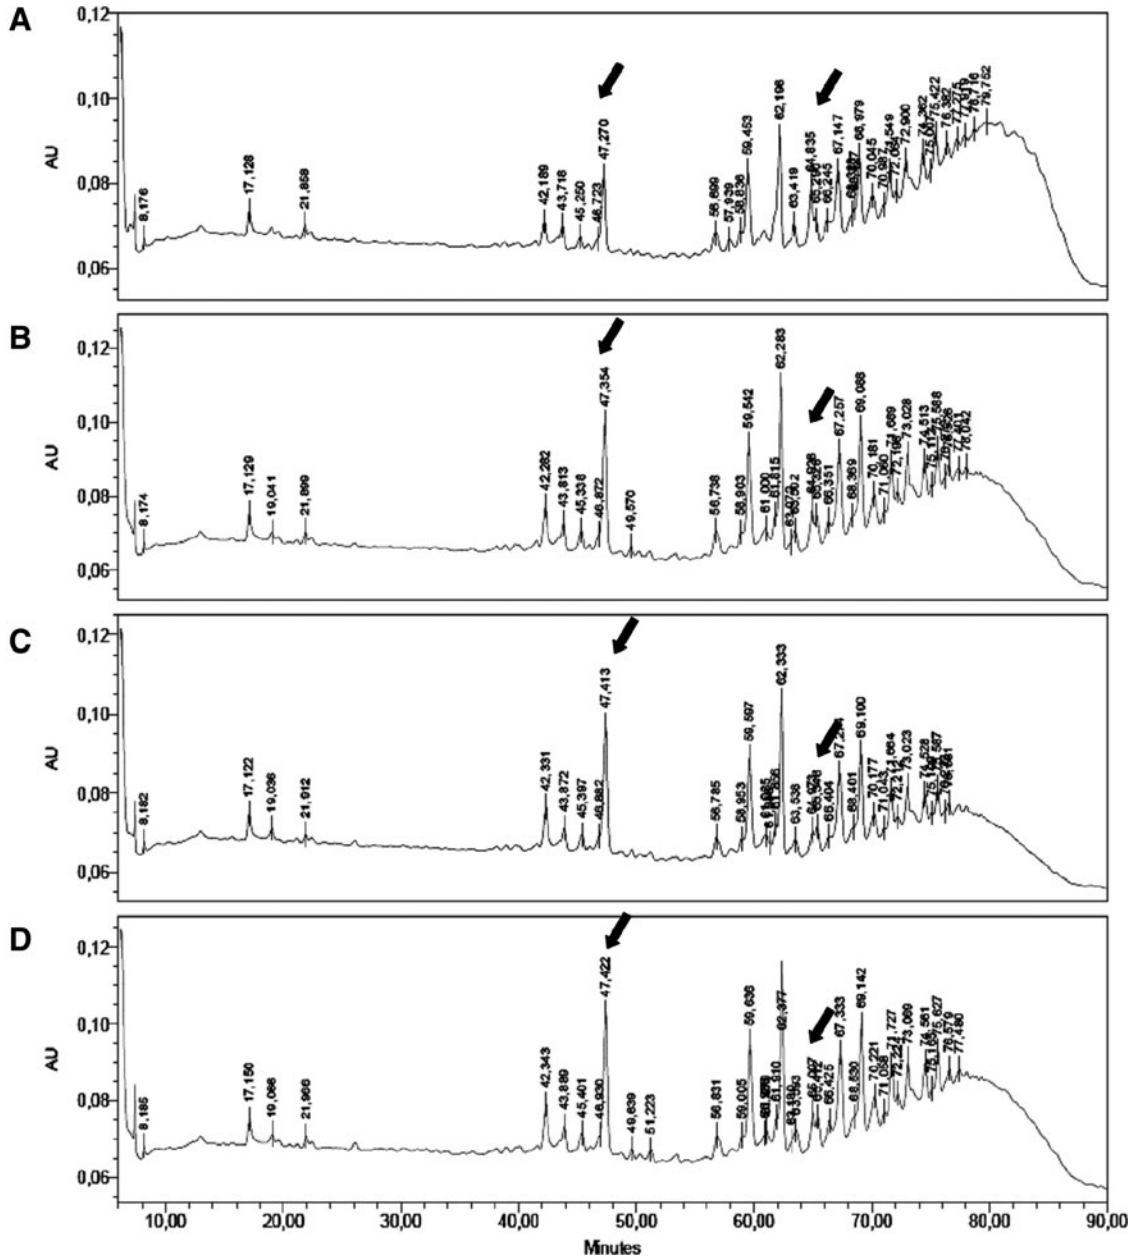

Supplement: Supp_Data1.pdf [file Supp_Data1.pdf]
